# Supplementary material for: Catalytic methane oxidation by a supramolecular conjugate based on a μ-nitrido-bridged iron porphyrinoid dimer
Source: Royal Society of Chemistry journal article supplement (doi:10.1039/c9nj02210d), 2019-01-01
Supplement: c9nj02210d1.pdf [file c9nj02210d1.pdf]

**Supplementary Information** for

**Catalytic Methane Oxidation by Supramolecular Conjugate Based on  
 $\mu$ -Nitrido-Bridged Iron Porphyrinoid Dimer**

Yasuyuki Yamada,<sup>1,2,3\*</sup> Kentaro Morita, Nozomi Mihara,<sup>1</sup> Kazunobu Igawa,<sup>4</sup> Katsuhiko Tomooka,<sup>4</sup> and Kentaro Tanaka<sup>1\*</sup>

<sup>1</sup>*Department of Chemistry, Graduate School of Science, Nagoya University, Furo-cho, Chikusa-ku, Nagoya 464-8602, Japan*

<sup>2</sup>*Research Center for Materials Science, Nagoya University, Furo-cho, Chikusa-ku, Nagoya 464-8602, Japan*

<sup>3</sup>*JST, PRESTO, 4-1-8 Honcho, Kawaguchi, Saitama, 332-0012, Japan*

<sup>4</sup>*Institute for Materials Chemistry and Engineering, and Department of Material and Molecular Sciences, Kyushu University, Kasuga-Koen, Kasuga, Fukuoka, 816-8580, Japan*

\*E-mail: [yamada.yasuyuki@h.mbox.nagoya-u.ac.jp](mailto:yamada.yasuyuki@h.mbox.nagoya-u.ac.jp), [kentaro@chem.nagoya-u.ac.jp](mailto:kentaro@chem.nagoya-u.ac.jp)

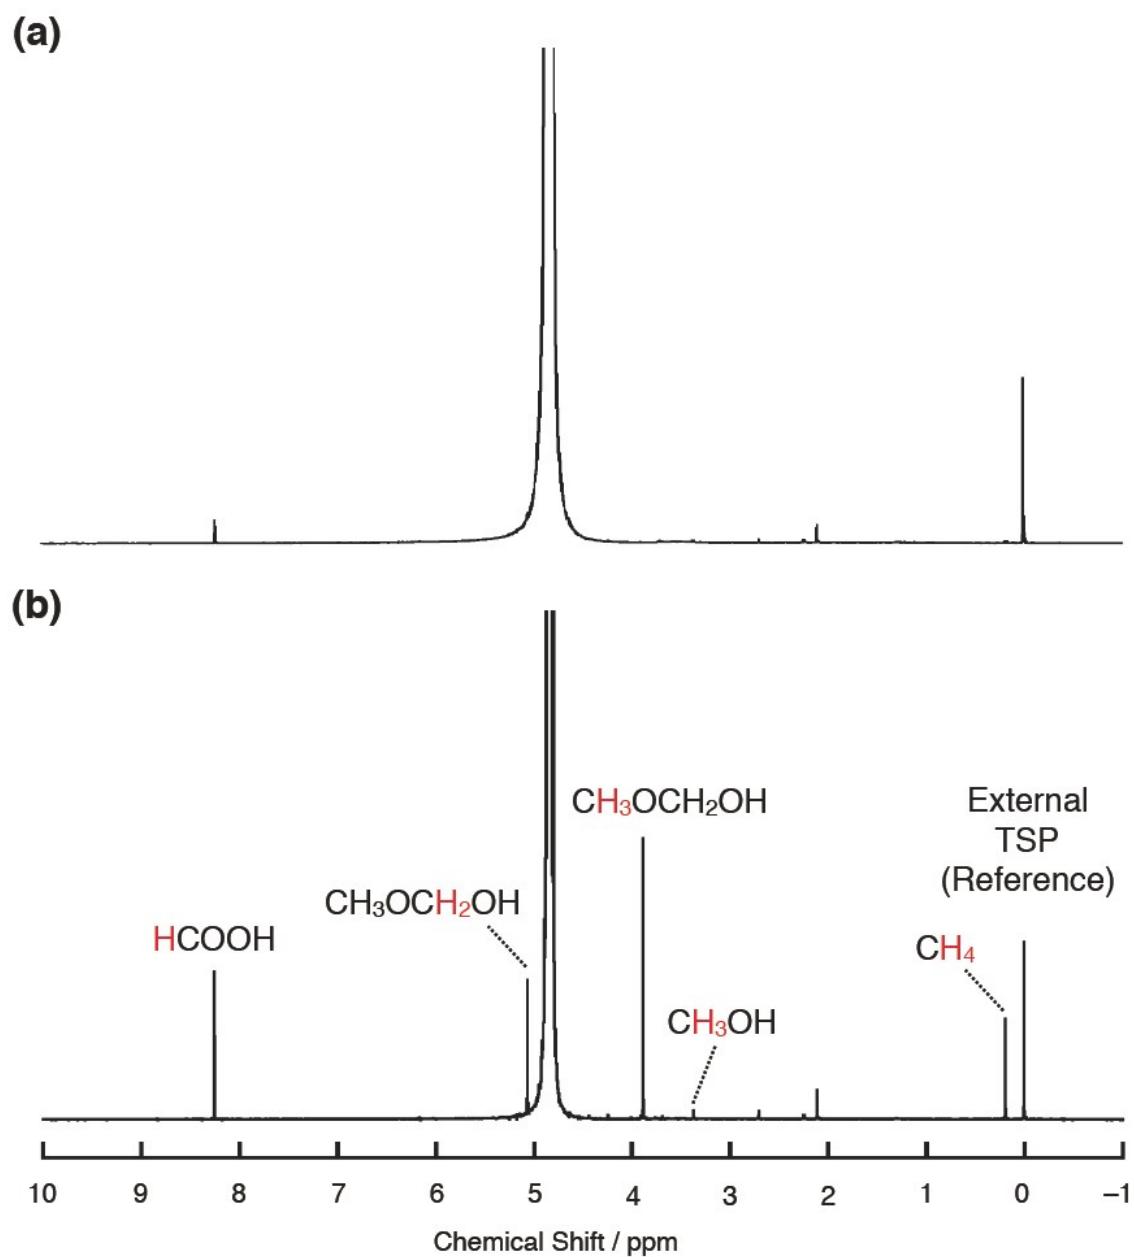

**Figure S1.** Comparison of  $^1\text{H}$ -NMR spectra of the reaction mixture in the (a) presence and (b) absence of methane. The reaction was carried out in  $\text{D}_2\text{O}$  (1.5 mL) in the presence of  $\mathbf{1}^{5+}\cdot 5\text{Cl}^-/\text{SiO}_2$  (141  $\mu\text{M}$  as  $\mathbf{1}^{5+}\cdot 5\text{Cl}^-$ ),  $\text{H}_2\text{O}_2$  (160 mM) and TFA (51 mM) under (a)  $\text{N}_2$  (1.0 MPa) or (b) methane (1.0 MPa) atmosphere at 60  $^\circ\text{C}$  for 8 hours.

**Table S1.** Oxidations of methane or ethane by  $\mu$ -nitrido-bridged iron porphyrinoid dimer-based catalysts on silica supports in the presence of  $\text{H}_2\text{O}_2$  in an acidic aqueous solution. Each reaction was carried out in the presence of a silica-supported catalyst (71  $\mu\text{M}$ ),  $\text{H}_2\text{O}_2$  (160 mM) and TFA (51 mM) in  $\text{H}_2\text{O}$  (1.5 mL) under methane or ethane (1.0 MPa) atmosphere at 60 °C.  $\text{TTN}_{\text{eff}}$ 's and  $\text{MCN}_{\text{eff}}$ 's were calculated according to the equations (i) - (iv) shown in the main text. \*Effective ethane conversion number ( $\text{ECN}_{\text{eff}}$ ) defined as the number of converted ethane into ethanol by one catalyst during the reaction.

| No. | Catalyst                                         | Substrate                | $T / ^\circ\text{C}$ | Reaction Time / hr | $\text{TTN}_{\text{eff}}$ | $\text{MCN}_{\text{eff}}$ |
|-----|--------------------------------------------------|--------------------------|----------------------|--------------------|---------------------------|---------------------------|
| 1   | $\text{I}^{5+}\text{-5Cl}^-$                     | $\text{CH}_4$            | 60                   | 1                  | 2                         | 3                         |
| 2   | $\text{I}^{5+}\text{-5Cl}^-$                     | $\text{CH}_4$            | 60                   | 2                  | 5                         | 4                         |
| 3   | $\text{I}^{5+}\text{-5Cl}^-$                     | $\text{CH}_4$            | 60                   | 3                  | 9                         | 5                         |
| 4   | $\text{I}^{5+}\text{-5Cl}^-$                     | $\text{CH}_4$            | 60                   | 4                  | 11                        | 6                         |
| 5   | $\text{I}^{5+}\text{-5Cl}^-$                     | $\text{CH}_4$            | 60                   | 5                  | 14                        | 7                         |
| 6   | $\text{I}^{5+}\text{-5Cl}^-$                     | $\text{CH}_4$            | 60                   | 6                  | 17                        | 9                         |
| 7   | $\text{I}^{5+}\text{-5Cl}^-$                     | $\text{CH}_4$            | 60                   | 7                  | 23                        | 11                        |
| 8   | $\text{I}^{5+}\text{-5Cl}^-$                     | $\text{CH}_4$            | 60                   | 8                  | 30                        | 13                        |
| 9   | $\text{I}^{5+}\text{-5Cl}^-$                     | $\text{CH}_4$            | 60                   | 16                 | 51                        | 21                        |
| 10  | $\text{I}^{5+}\text{-5Cl}^-$                     | $\text{CH}_4$            | 60                   | 24                 | 59                        | 23                        |
| 11  | $\text{I}^{5+}\text{-5Cl}^-$                     | $\text{CH}_3\text{CH}_3$ | 60                   | 24                 | 241                       | *117                      |
| 12  | $\text{I}^{5+}\text{-Cu(II)-TPPS}^+\text{-Cl}^-$ | $\text{CH}_4$            | 60                   | 8                  | 44                        | 18                        |
| 13  | $\text{I}^{5+}\text{-Ni(II)-TPPS}^+\text{-Cl}^-$ | $\text{CH}_4$            | 60                   | 8                  | 47                        | 19                        |

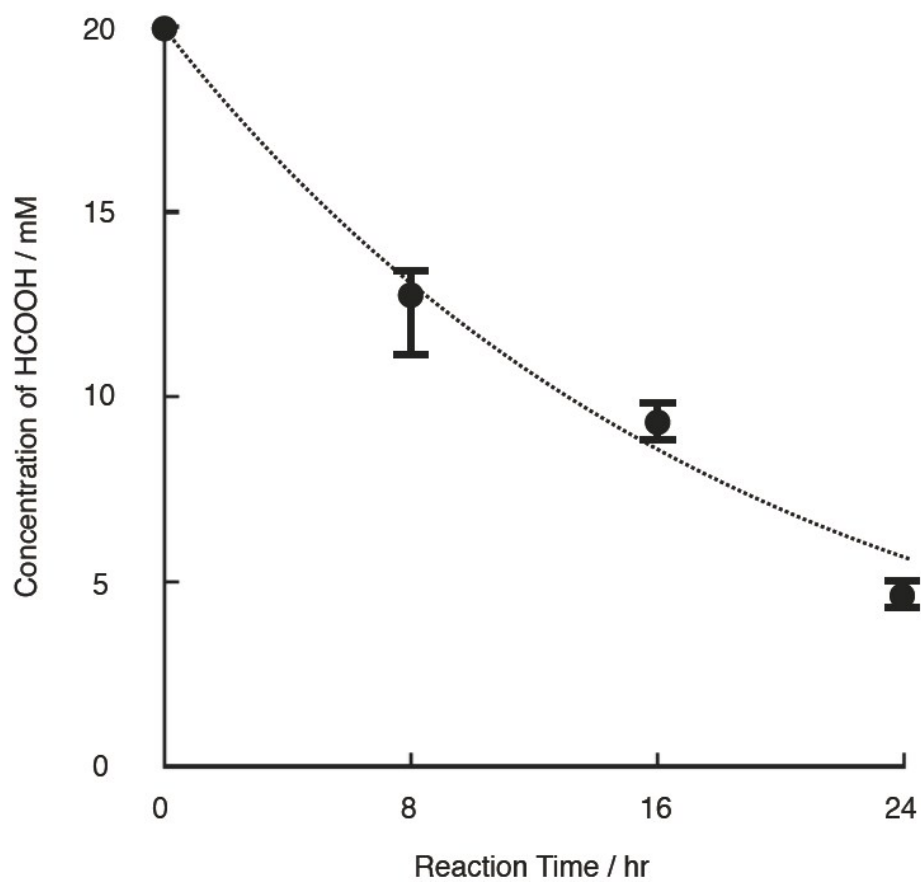

**Figure S2.** Changes in the concentration of HCOOH during the oxidation reaction of 20 mM (initial concentration) of HCOOH by  $\mathbf{1}^{5+} \cdot 5\text{Cl}^-/\text{SiO}_2$  in the presence of  $\text{H}_2\text{O}_2$  (160 mM) and TFA (51 mM) in  $\text{H}_2\text{O}$  (1.5 mL) at  $60^\circ\text{C}$ .
